# Supplementary material for: Potential Germination Success of Exotic and Native Trees Coexisting in Central Spain Riparian Forests
Source: Hindawi journal article supplement (doi:10.1155/2016/7614683), 2016-01-01

**Supplementary material**

**Table S1.** Cumulative seed germination (*Gmax*) and mean time to germination (*Tgerm*) in two populations (Jadraque and Alcalá) of the invaders *A. altissima* and *R. pseudoacacia* (means ± SE for N=150). Germination tests performed on different months (November 2011 to October 2012) reflect the effect of seed age.

|  |  |  | Time of germination test | | | | | | | | | | | | | |
| --- | --- | --- | --- | --- | --- | --- | --- | --- | --- | --- | --- | --- | --- | --- | --- | --- |
|  |  |  | November 2011 | |  | February 2012 | |  | May 2012 | |  | August 2012 | |  | October 2012 | |
| Species | Population | Parameters | C | S |  | C | S |  | C | S |  | C | S |  | C | S |
| *A. altissima* | Jadraque | *Gmax* | 48.0±4.5 | - |  | 69.3±5.4 | 76.0±3.1 |  | 94.0±1.6 | 90.8±1.5 |  | - | 80.8±3.8 |  | - | 68.3±5.0 |
| *Tgerm* | 19.3±1.4 | - |  | 16.8±1.2 | 10.9±0.3 |  | 12.1±0.7 | 9.6±0.4 |  | - | 14.9±0.9 |  | - | 10.0±0.5 |
| Alcalá | *Gmax* | 50.0±7.2 | - |  | 89.3±2.8 | 83.8±4.2 |  | 97.1±1.7 | 95.2±1.7 |  | 91.7±1.8 | 89.9±2.2 |  | - | 76.1±3.7 |
| *Tgerm* | 20.1±1.4 | - |  | 18.0±1.6 | 10.5±0.5 |  | 12.9±0.9 | 7.8±0.2 |  | 16.3±1.3 | 10.9±0.3 |  | - | 9.1±0.4 |
| *R. pseudoacacia* | Jadraque | *Gmax* | 85.1±3.6 | - |  | 35.3±8.7 | 34.8±6.0 |  | 82.0±5.1 | 57.0±5.8 |  | 32.3±9.2 | 91.3±2.2 |  | 85.3±3.5 | - |
| *Tgerm* | 5.0±0.7 | - |  | 5.9±1.0 | 9.9±1.4 |  | 9.3±1.3 | 13.4±1.2 |  | 4.2±0.9 | 2.9±0.4 |  | 6.6±0.8 | - |
| Alcalá | *Gmax* | 43.6±4.7 | - |  | 65.0±3.7 | 70.3±5.3 |  | 71.4±5.5 | 91.7±2.8 |  | 93.4±1.7 | 91.9±2.0 |  | 83.7±3.4 | 64.1±4.9 |
| *Tgerm* | 4.0±0.6 | - |  | 4.5±0.6 | 3.5±0.5 |  | 4.7±0.5 | 5.0±0.6 |  | 2.4±0.2 | 3.0±0.4 |  | 2.0±0.1 | 4.8±1.0 |

(C) Canopy seed bank, (S) Soil seed bank.

**Figure S1.** Cumulative germination curves of the coexisting riparian native and exotic species in two locations (Jadraque and Alcalá). Germination curves for *R. pseudoacacia* are shown with and without pretreatment in each case.

G*max*

**Figure S2.** *Ailanthus altissima* female tree holding seeds from different cohorts simultaneously (brownish ripe seeds from the precedent year and greenish still unripe seeds) at the end of July (Alcalá de Henares, Spain).


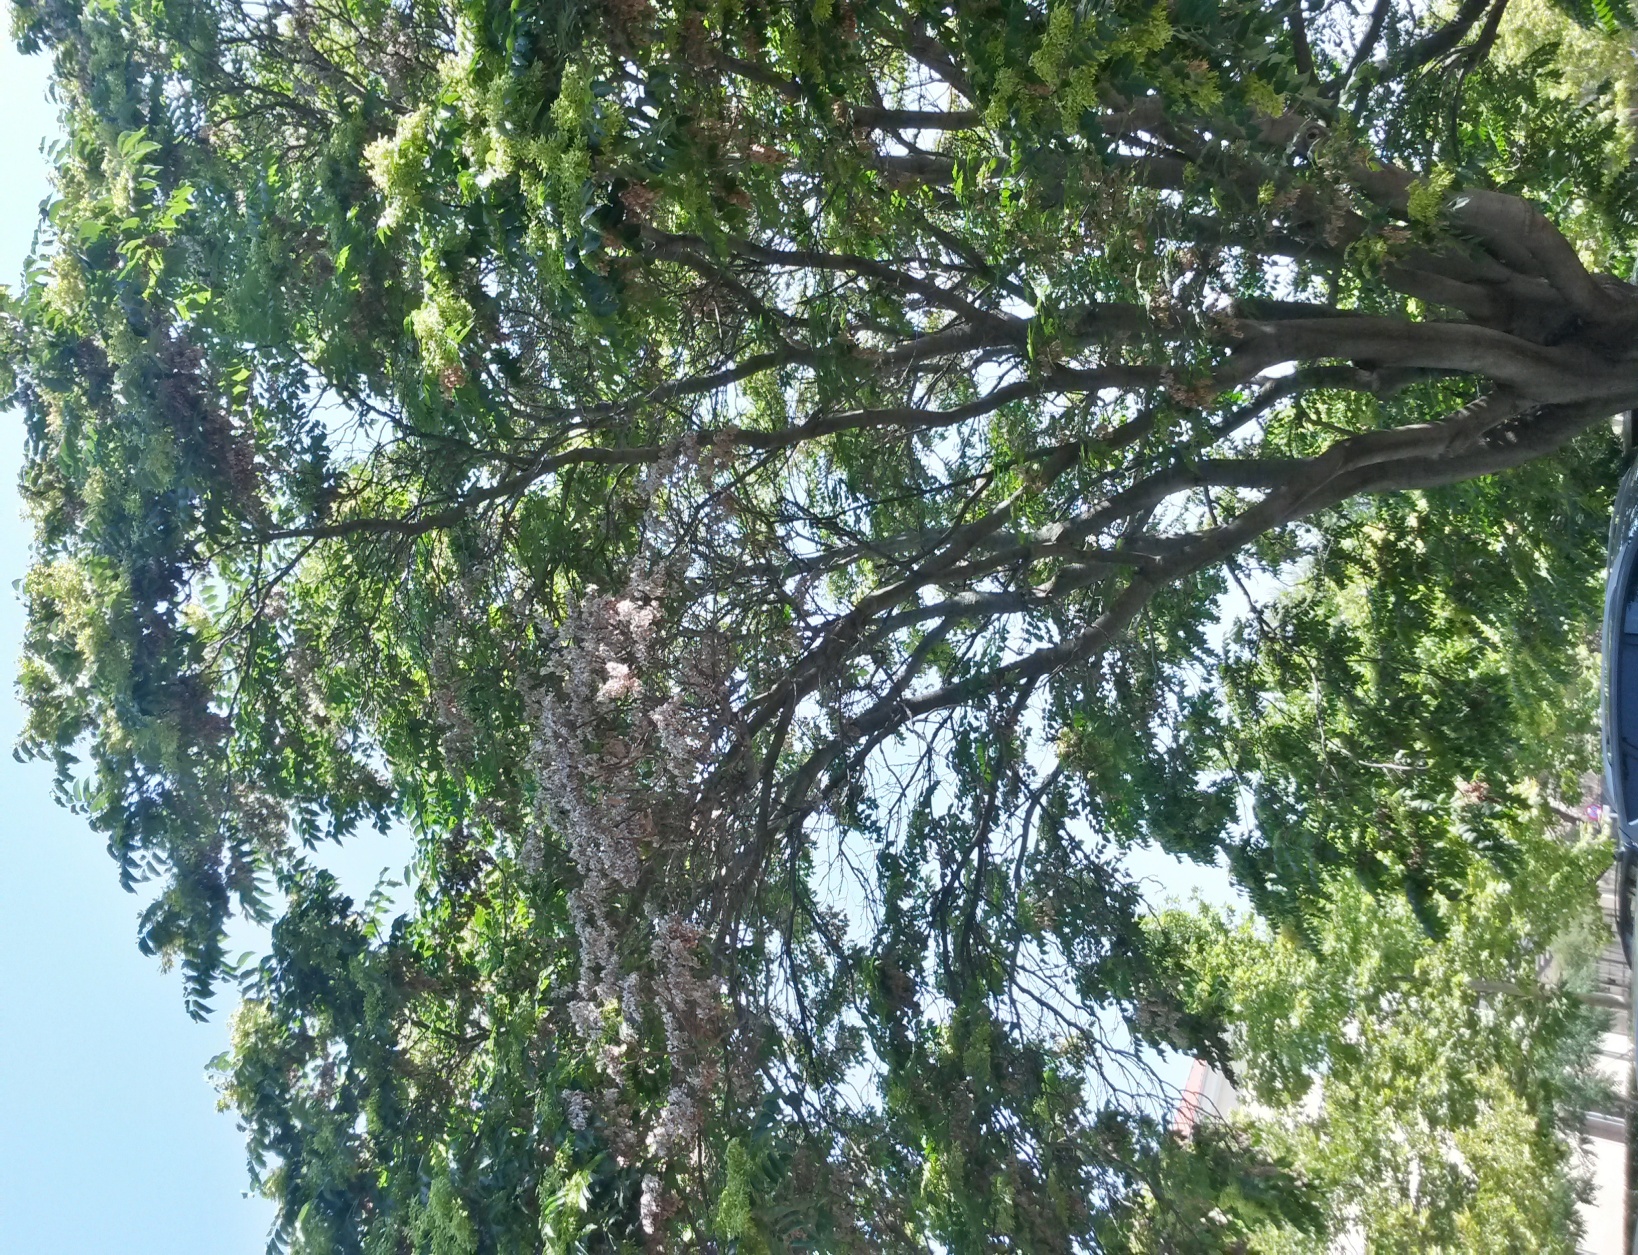


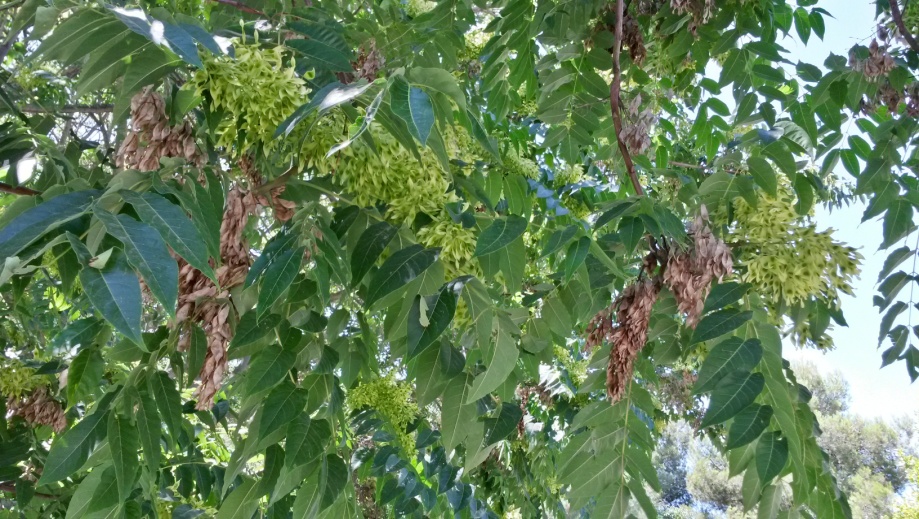

Supplement: f1 [file 7614683.f1.docx]
